# Supplementary material
Source: PubMed Central journal article supplement (PMC6385697)
Supplement: DC182021SupplementaryData.pdf [file DC182021SupplementaryData.pdf]

SUPPLEMENTARY DATA

**Supplementary Table 1. Characteristics of Mothers during HAPO Pregnancy OGTT and their Children at Follow-up**

| <b>Characteristics – Mothers (n=4160)</b>  | <b>Mean (SD)</b> |
|--------------------------------------------|------------------|
| Age at OGTT (yrs)                          | 29.9 (5.7)       |
| Gestational Age at OGTT (wks)              | 27.6 (1.7)       |
| Height (cm)                                | 161.7 (6.8)      |
| Weight (kg)                                | 71.8 (14.1)      |
| Body Mass Index (BMI) (kg/m <sup>2</sup> ) | 27.4 (4.9)       |
| Mean Arterial Pressure (mmHg)              | 80.3 (7.9)       |
| Fasting Plasma Glucose (mmol/l)            | 4.5 (0.4)        |
| 1-hr Plasma Glucose (mmol/l)               | 7.4 (1.7)        |
| 2-hr Plasma Glucose (mmol/l)               | 6.1 (1.3)        |
| Sum of glucose z-scores                    | -0.1 (2.3)       |
|                                            | <b>N (%)</b>     |
| <b>Race/Ethnicity</b>                      |                  |
| White, Non-Hispanic                        | 1778 (42.7)      |
| Hispanic                                   | 465 (11.2)       |
| Black, Non-Hispanic                        | 719 (17.3)       |
| Asian                                      | 1125 (27.0)      |
| Other                                      | 73 (1.8)         |
| Any Prenatal Smoking                       | 177 (4.3)        |
| Any Prenatal Alcohol Use                   | 283 (6.8)        |
| Parity (any prior delivery ≥ 20 weeks)     | 2146 (51.6)      |
|                                            | <b>Mean (SD)</b> |
| <b>Characteristics – Children (n=4160)</b> |                  |
| <b>At Follow-up</b>                        |                  |
| Age (yrs)                                  | 11.4 (1.2)       |
| Height (cm)                                | 148.5 (10.4)     |
| Weight (kg)                                | 43.2 (13.6)      |
| BMI (kg/m <sup>2</sup> )                   | 19.3 (4.4)       |
| BMI z-score                                | 0.5 (1.3)        |
|                                            | <b>N (%)</b>     |
| Sex – Female                               | 2034 (48.9)      |
| <b>Tanner Stage - Girls</b>                |                  |
| 1                                          | 340 (19.0)       |
| 2/3                                        | 761 (42.6)       |
| 4/5                                        | 686 (38.4)       |

## SUPPLEMENTARY DATA

|                            |             |
|----------------------------|-------------|
| Tanner Stage - Boys        |             |
| 1                          | 523 (35.9)  |
| 2/3                        | 673 (46.1)  |
| 4/5                        | 263 (18.0)  |
| Family History of Diabetes | 1899 (45.7) |

\*GDM=gestational diabetes mellitus defined by IADPSG criteria (1 or more glucose values from a 75g OGTT equals or exceeds FPG 5.1 mmol/l, 1-hr 10.0 mmol/l, 2-hr 8.5 mmol/l)

SUPPLEMENTARY DATA

**Supplementary Table 2. Characteristics of HAPO FUS Participants and Non-Participants**

| HAPO Maternal Characteristics   | Participants<br>N=4832 | Non-Participants<br>N=10980 | Participants<br>N=4832 | Non-Participants<br>N=10980 |
|---------------------------------|------------------------|-----------------------------|------------------------|-----------------------------|
|                                 | Unweighted Summaries   |                             | Weighted Summaries*    |                             |
|                                 | Mean (SD)              | Mean (SD)                   | Mean (SD)              | Mean (SD)                   |
| Age at OGTT (yrs)               | 29.9 (5.7)             | 29.1 (5.7)                  | 30.0 (5.1)             | 29.1 (5.3)                  |
| Body Mass Index (BMI)           | 27.5 (4.9)             | 27.5 (5.1)                  | 27.5 (4.6)             | 27.5 (4.7)                  |
| Height (cm)                     | 161.8 (6.8)            | 160.7 (7.3)                 | 161.1 (6.2)            | 160.9 (6.3)                 |
| Fasting Plasma Glucose (mmol/l) | 4.5 (0.4)              | 4.5 (0.4)                   | 4.5 (0.4)              | 4.5 (0.4)                   |
| 1-h Plasma Glucose (mmol/l)     | 7.4 (1.7)              | 7.5 (1.7)                   | 7.5 (1.7)              | 7.5 (1.7)                   |
| 2-h Plasma Glucose (mmol/l)     | 6.1 (1.3)              | 6.2 (1.3)                   | 6.2 (1.3)              | 6.2 (1.3)                   |
|                                 | <b>N (%)</b>           | <b>N (%)</b>                | <b>(%)</b>             | <b>(%)</b>                  |
| GDM                             | 683 (14.1)             | 1879 (17.1)                 | (14.9)                 | (16.9)                      |
| Race/Ethnicity                  |                        |                             |                        |                             |
| White, non-Hispanic             | 2287 (47.3)            | 4705 (42.9)                 | (44.5)                 | (44.1)                      |
| Hispanic                        | 507 (10.5)             | 1047 (9.5)                  | (10.3)                 | (9.6)                       |
| Black, non-Hispanic             | 775 (16.0)             | 1551 (14.1)                 | (14.8)                 | (14.6)                      |
| Asian                           | 1176 (24.3)            | 3424 (31.2)                 | (28.5)                 | (29.3)                      |
| Other                           | 87 (1.8)               | 253 (2.3)                   | (1.8)                  | (2.3)                       |

\* Weighted summaries are weighted means and standard deviations or weighted percentages based on field-center-specific summary statistics with weights proportional to the total eligible population at the field center.

\*\*GDM=gestational diabetes mellitus defined by IADPSG criteria (1 or more glucose values from a 75g OGTT equals or exceeds FPG 5.1 mmol/l, 1-h 10.0 mmol/l, 2-h 8.5 mmol/l)

SUPPLEMENTARY DATA

**Supplementary Table 3. Tanner Stage Specific Associations between Maternal Glucose Levels during Pregnancy and Continuous Child Metabolic Outcomes**

| Child Continuous Metabolic Outcomes | Tanner Stage 1<br>Beta (95% CI), p | Tanner Stage 2/3<br>Beta (95% CI), p | Tanner Stage 4/5<br>Beta (95% CI), p |
|-------------------------------------|------------------------------------|--------------------------------------|--------------------------------------|
|                                     | <b>Maternal fasting glucose*</b>   |                                      |                                      |
| Fasting glucose (mmol/l)            | 0.05 (0.02-0.08), p<0.001          | 0.05 (0.03-0.07), p<0.001            | 0.05 (0.02-0.07), p<0.001            |
| 30 min glucose (mmol/l)             | 0.03 (-0.08-0.13), p=0.61          | 0.05 (-0.02-0.12), p=0.19            | 0.15 (0.06-0.24), p=0.002            |
| 1-h glucose (mmol/l)                | -0.03 (-0.16-0.11), p=0.72         | -0.01 (-0.11-0.09), p=0.86           | 0.08 (-0.04-0.2), p=0.19             |
| 2-h glucose (mmol/l)                | 0.07 (-0.01-0.16), p=0.10          | 0.02 (-0.05-0.08), p=0.62            | 0.04 (-0.04-0.12), p=0.31            |
| Sum of glucose z-scores             | 0.13 (-0.09-0.35), p=0.25          | 0.2 (0.04-0.35), p=0.01              | 0.31 (0.11-0.51), p=0.002            |
| A1c (%)                             | 0.01 (-0.01-0.03), p=0.40          | 0.02 (0-0.04), p=0.02                | 0.02 (-0.01-0.04), p=0.16            |
| Matsuda index                       | -43.92 (-95.15-7.31), p=0.09       | -47.31 (-83.81- -10.8), p=0.01       | -26.54 (-64.17-11.09), p=0.17        |
| Insulinogenic index                 | 0.04 (-0.01-0.09), p=0.16          | 0.03 (-0.01-0.06), p=0.12            | -0.07 (-0.14-0), p=0.04              |
| Disposition index                   | -0.01 (-0.05-0.04), p=0.83         | 0 (-0.04-0.04), p=0.99               | -0.05 (-0.09-0), p=0.05              |
|                                     | <b>Maternal 1-h glucose*</b>       |                                      |                                      |
| Fasting glucose (mmol/l)            | 0.02 (-0.01-0.05), p=0.20          | 0.03 (0.01-0.05), p=0.002            | 0.02 (0-0.05), p=0.06                |
| 30 min glucose (mmol/l)             | 0.21 (0.11-0.32), p<0.001          | 0.2 (0.13-0.27), p<0.001             | 0.19 (0.1-0.28), p<0.001             |
| 1-h glucose (mmol/l)                | 0.2 (0.06-0.33), p=0.005           | 0.25 (0.16-0.35), p<0.001            | 0.26 (0.15-0.37), p<0.001            |
| 2-h glucose (mmol/l)                | 0.08 (-0.01-0.17), p=0.07          | 0.12 (0.06-0.18), p<0.001            | 0.13 (0.05-0.21), p=0.001            |
| Sum of glucose z-scores             | 0.35 (0.13-0.57), p=0.002          | 0.5 (0.35-0.65), p<0.001             | 0.47 (0.28-0.66), p<0.001            |
| A1c (%)                             | 0 (-0.02-0.03), p=0.74             | 0.02 (0.01-0.04), p=0.007            | 0 (-0.02-0.02), p=0.73               |

SUPPLEMENTARY DATA

|                          |                                         |                                  |                                 |
|--------------------------|-----------------------------------------|----------------------------------|---------------------------------|
| Matsuda index            | -64.08 (-114.9--13.25), p=0.01          | -82.07 (-117.57--46.58), p<0.001 | -61.95 (-97.98--25.93), p<0.001 |
| Insulinogenic index      | -0.05 (-0.1-0.01), p=0.08               | -0.03 (-0.06-0), p=0.06          | -0.06 (-0.13-0), p=0.06         |
| Disposition index        | -0.09 (-0.14--0.05), p<0.001            | -0.08 (-0.12--0.05), p<0.001     | -0.08 (-0.13--0.04), p<0.001    |
|                          | <b>Maternal 2-h glucose*</b>            |                                  |                                 |
| Fasting glucose (mmol/l) | 0 (-0.02-0.03), p=0.77                  | 0.03 (0.01-0.05), p=0.005        | 0 (-0.02-0.03), p=0.76          |
| 30 min glucose (mmol/l)  | 0.1 (0-0.2), p=0.05                     | 0.12 (0.05-0.19), p<0.001        | 0.11 (0.03-0.2), p=0.008        |
| 1-h glucose (mmol/l)     | 0.11 (-0.02-0.24), p=0.11               | 0.17 (0.08-0.27), p<0.001        | 0.16 (0.05-0.26), p=0.005       |
| 2-h glucose (mmol/l)     | 0.03 (-0.05-0.12), p=0.42               | 0.06 (0-0.12), p=0.05            | 0.11 (0.03-0.18), p=0.005       |
| Sum of glucose z-scores  | 0.18 (-0.03-0.39), p=0.10               | 0.34 (0.19-0.48), p<0.001        | 0.29 (0.1-0.47), p=0.003        |
| A1c (%)                  | -0.01 (-0.03-0.01), p=0.49              | 0.01 (0-0.03), p=0.14            | 0 (-0.02-0.02), p=0.80          |
| Matsuda index            | -49.53 (-98.8--0.26), p=0.05            | -45.93 (-80.26--11.59), p=0.009  | -48.58 (-83.51--13.66), p=0.007 |
| Insulinogenic index      | -0.01 (-0.06-0.04), p=0.74              | -0.03 (-0.06-0), p=0.05          | -0.03 (-0.09-0.03), p=0.36      |
| Disposition index        | -0.04 (-0.08-0.01), p=0.11              | -0.07 (-0.1--0.03), p<0.001      | -0.05 (-0.09--0.01), p=0.02     |
|                          | <b>Maternal sum of glucose z-scores</b> |                                  |                                 |
| Fasting glucose (mmol/l) | 0.01 (0-0.03), p=0.03                   | 0.02 (0.01-0.03), p<0.001        | 0.01 (0-0.02), p=0.02           |
| 30 min glucose (mmol/l)  | 0.06 (0.02-0.11), p=0.005               | 0.07 (0.04-0.1), p<0.001         | 0.08 (0.05-0.12), p<0.001       |
| 1-h glucose (mmol/l)     | 0.05 (-0.01-0.11), p=0.08               | 0.08 (0.04-0.12), p<0.001        | 0.09 (0.05-0.14), p<0.001       |
| 2-h glucose (mmol/l)     | 0.03 (0-0.07), p=0.06                   | 0.04 (0.01-0.07), p=0.006        | 0.05 (0.02-0.09), p=0.002       |
| Sum of glucose z-scores  | 0.12 (0.03-0.22), p=0.009               | 0.2 (0.13-0.26), p<0.001         | 0.2 (0.12-0.28), p<0.001        |
| A1c (%)                  | 0 (-0.01-0.01), p=0.83                  | 0.01 (0-0.02), p=0.005           | 0 (-0.01-0.01), p=0.58          |

## SUPPLEMENTARY DATA

|                     |                                |                                 |                                |
|---------------------|--------------------------------|---------------------------------|--------------------------------|
| Matsuda index       | -29.82 (-51.73--7.92), p=0.008 | -33.18 (-48.57--17.79), p<0.001 | -25.8 (-41.36--10.24), p=0.001 |
| Insulinogenic index | 0 (-0.03-0.02), p=0.77         | -0.01 (-0.02-0.01), p=0.30      | -0.03 (-0.06-0), p=0.04        |
| Disposition index   | -0.03 (-0.04--0.01), p=0.01    | -0.03 (-0.04--0.01), p<0.001    | -0.03 (-0.05--0.01), p<0.001   |

GDM=gestational diabetes mellitus defined by IADPSG criteria (1 or more glucose values from a 75g OGTT equals or exceeds FPG 5.1 mmol/l, 1-hr 10.0 mmol/l, 2-hr 8.5 mmol/l)

\*Beta estimates reported for maternal glucose higher by 1 standard deviation

Association results use fully adjusted Model 4: Adjusted for field center + child age, sex, pubertal status (Tanner stage 1, 2/3, 4/5, sex x Tanner stage interaction) + maternal variables at pregnancy OGTT (age, height, mean arterial pressure, parity (0, 1+), smoking (yes/no), drinking (yes/no), gestational age), child's family history of diabetes in first degree relatives + maternal BMI at pregnancy OGTT + child's BMI z-score.

SUPPLEMENTARY DATA

**Supplementary Table 4. Tanner Stage Specific Associations between Maternal Glucose Levels during Pregnancy and Dichotomous Child Glucose Outcomes**

| Dichotomous Child Glucose Outcomes | Tanner Stage 1<br>OR (95% CI), p        | Tanner Stage 2/3<br>OR (95% CI), p | Tanner Stage 4/5<br>OR (95% CI), p |
|------------------------------------|-----------------------------------------|------------------------------------|------------------------------------|
|                                    | <b>Maternal fasting glucose*</b>        |                                    |                                    |
| IFG-ADA                            | 1.19 (0.88-1.62), p=0.2612              | 1.47 (1.17-1.84), p=0.0009         | 1.14 (0.85-1.51), p=0.3855         |
| IGT                                | 1.02 (0.67-1.57), p=0.9254              | 1.12 (0.89-1.41), p=0.3214         | 1.37 (0.96-1.95), p=0.0821         |
|                                    | <b>Maternal 1-h glucose*</b>            |                                    |                                    |
| IFG-ADA                            | 1.09 (0.8-1.47), p=0.6011               | 1.21 (0.97-1.51), p=0.0916         | 0.94 (0.7-1.26), p=0.6799          |
| IGT                                | 1.42 (0.93-2.18), p=0.1039              | 1.51 (1.2-1.89), p=0.0004          | 1.52 (1.08-2.15), p=0.0173         |
|                                    | <b>Maternal 2-h glucose*</b>            |                                    |                                    |
| IFG-ADA                            | 0.92 (0.68-1.25), p=0.6017              | 1.24 (1-1.54), p=0.0509            | 0.88 (0.66-1.16), p=0.3677         |
| IGT                                | 1.18 (0.78-1.78), p=0.4304              | 1.15 (0.93-1.43), p=0.2043         | 1.21 (0.88-1.67), p=0.2462         |
|                                    | <b>Maternal sum of glucose z-scores</b> |                                    |                                    |
| IFG-ADA                            | 1.03 (0.91-1.18), p=0.6285              | 1.16 (1.05-1.28), p=0.0025         | 0.99 (0.87-1.12), p=0.8354         |
| IGT                                | 1.10 (0.92-1.32), p=0.2824              | 1.13 (1.03-1.24), p=0.0119         | 1.18 (1.02-1.36), p=0.0243         |

GDM=gestational diabetes mellitus defined by IADPSG criteria (1 or more glucose values from a 75g OGTT equals or exceeds FPG 5.1 mmol/l, 1-hr 10.0 mmol/l, 2-hr 8.5 mmol/l)

\*ORs reported for maternal glucose higher by 1 standard deviation

Association results use fully adjusted Model 4: Adjusted for field center + child age, sex, pubertal status (Tanner stage 1, 2/3, 4/5, sex x Tanner stage interaction) + maternal variables at pregnancy OGTT (age, height, mean arterial pressure, parity (0, 1+), smoking (yes/no), drinking (yes/no), gestational age), child's family history of diabetes in first degree relatives + maternal BMI at pregnancy OGTT + child's BMI z-score.

SUPPLEMENTARY DATA

**Supplementary Table 5. Means of child glucose levels and adjusted mean differences for Models 1-4 across maternal glucose categories**

| <b>Maternal Glucose Levels</b>        | <b>Mean (SD)</b> | <b>Model 1<br/>Adjusted Mean<br/>Difference<br/>(95% CI)</b> | <b>Model 2<br/>Adjusted Mean<br/>Difference<br/>(95% CI)</b> | <b>Model 3<br/>Adjusted Mean<br/>Difference<br/>(95% CI)</b> | <b>Model 4<br/>Adjusted Mean<br/>Difference<br/>(95% CI)</b> |
|---------------------------------------|------------------|--------------------------------------------------------------|--------------------------------------------------------------|--------------------------------------------------------------|--------------------------------------------------------------|
| <b>Child Fasting Glucose (mmol/l)</b> |                  |                                                              |                                                              |                                                              |                                                              |
| FPG (mmol/l)                          |                  |                                                              |                                                              |                                                              |                                                              |
| ≤ 4.2                                 | 4.91 (0.37)      | -                                                            | -                                                            | -                                                            | -                                                            |
| 4.2-4.4                               | 4.98 (0.40)      | 0.06 (0.03-0.09)                                             | 0.06 (0.03-0.09)                                             | 0.06 (0.03-0.09)                                             | 0.06 (0.03-0.09)                                             |
| 4.5-4.7                               | 5.01 (0.38)      | 0.09 (0.06-0.12)                                             | 0.09 (0.06-0.12)                                             | 0.09 (0.05-0.12)                                             | 0.09 (0.06-0.12)                                             |
| 4.8-5.0                               | 5.07 (0.36)      | 0.13 (0.10-0.17)                                             | 0.14 (0.10-0.18)                                             | 0.13 (0.09-0.17)                                             | 0.14 (0.10-0.18)                                             |
| ≥ 5.1                                 | 5.06 (0.42)      | 0.12 (0.07-0.16)                                             | 0.12 (0.07-0.17)                                             | 0.11 (0.06-0.16)                                             | 0.12 (0.07-0.17)                                             |
| 1-h PG (mmol/l)                       |                  |                                                              |                                                              |                                                              |                                                              |
| ≤ 5.8                                 | 4.95 (0.40)      | -                                                            | -                                                            | -                                                            | -                                                            |
| 5.9-7.3                               | 5.00 (0.38)      | 0.01 (-0.02-0.04)                                            | 0.01 (-0.02-0.04)                                            | 0.01 (-0.02-0.04)                                            | 0.01 (-0.02-0.04)                                            |
| 7.4-8.6                               | 5.02 (0.39)      | 0.03 (-0.005-0.06)                                           | 0.03 (-0.01-0.06)                                            | 0.03 (-0.01-0.06)                                            | 0.03 (-0.01-0.06)                                            |
| 8.7-9.9                               | 5.05 (0.37)      | 0.05 (0.01-0.09)                                             | 0.05 (0.01-0.09)                                             | 0.04 (0.01-0.08)                                             | 0.05 (0.01-0.08)                                             |
| ≥ 10.0                                | 5.07 (0.41)      | 0.07 (0.02-0.12)                                             | 0.07 (0.02-0.12)                                             | 0.07 (0.02-0.11)                                             | 0.07 (0.02-0.12)                                             |
| 2-h PG (mmol/l)                       |                  |                                                              |                                                              |                                                              |                                                              |
| ≤ 5.0                                 | 4.94 (0.40)      | -                                                            | -                                                            | -                                                            | -                                                            |
| 5.1-6.0                               | 4.99 (0.39)      | 0.04 (0.01-0.07)                                             | 0.03 (0.004-0.07)                                            | 0.03 (0.001-0.06)                                            | 0.03 (0.002-0.06)                                            |
| 6.1-6.9                               | 5.01 (0.37)      | 0.04 (0.01-0.07)                                             | 0.04 (0.004-0.07)                                            | 0.04 (0.003-0.07)                                            | 0.04 (0.004-0.07)                                            |



SUPPLEMENTARY DATA

|                                         |             |                    |                     |                    |                    |
|-----------------------------------------|-------------|--------------------|---------------------|--------------------|--------------------|
| 7.0-8.4                                 | 5.04 (0.39) | 0.05 (0.02-0.09)   | 0.05 (0.02-0.09)    | 0.05 (0.01-0.09)   | 0.05 (0.01-0.09)   |
| ≥ 8.5                                   | 5.04 (0.39) | 0.04 (-0.01-0.10)  | 0.04 (-0.01-0.09)   | 0.03 (-0.01-0.09)  | 0.04 (-0.02-0.09)  |
| <b>Child 30-minute Glucose (mmol/l)</b> |             |                    |                     |                    |                    |
| FPG (mmol/l)                            |             |                    |                     |                    |                    |
| ≤ 4.2                                   | 7.63 (1.32) | -                  | -                   | -                  | -                  |
| 4.2-4.4                                 | 7.72 (1.35) | -0.01 (-0.13-0.11) | -0.002 (-0.12-0.12) | -0.01 (-0.13-0.11) | -0.09 (-0.01-0.01) |
| 4.5-4.7                                 | 7.82 (1.30) | 0.08 (-0.05-0.20)  | 0.09 (-0.04-0.21)   | 0.07 (-0.05-0.20)  | 0.09 (-0.04-0.21)  |
| 4.8-5.0                                 | 8.01 (1.36) | 0.17 (0.03-0.31)   | 0.19 (0.04-0.33)    | 0.16 (0.02-0.30)   | 0.19 (0.04-0.33)   |
| ≥ 5.1                                   | 7.94 (1.29) | 0.09 (-0.09-0.28)  | 0.06 (-0.06-0.31)   | 0.08 (-0.10-0.27)  | 0.12 (-0.06-0.31)  |
| 1-h PG (mmol/l)                         |             |                    |                     |                    |                    |
| ≤ 5.8                                   | 7.53 (1.44) | -                  | -                   | -                  | -                  |
| 5.9-7.3                                 | 7.65 (1.25) | 0.07 (-0.04-0.18)  | 0.08 (-0.04-0.19)   | 0.07 (-0.04-0.18)  | 0.08 (-0.04-0.19)  |
| 7.4-8.6                                 | 7.91 (1.29) | 0.25 (0.13-0.37)   | 0.26 (0.14-0.38)    | 0.25 (0.13-0.37)   | 0.26 (0.14-0.38)   |
| 8.7-9.9                                 | 8.00 (1.24) | 0.33 (0.19-0.47)   | 0.34 (0.20-0.48)    | 0.32 (0.18-0.46)   | 0.34 (0.20-0.48)   |
| ≥ 10.0                                  | 8.36 (1.41) | 0.61 (0.43-0.78)   | 0.62 (0.44-0.80)    | 0.60 (0.43-0.78)   | 0.62 (0.44-0.79)   |
| 2-h PG (mmol/l)                         |             |                    |                     |                    |                    |
| ≤ 5.0                                   | 7.63 (1.43) | -                  | -                   | -                  | -                  |
| 5.1-6.0                                 | 7.72 (1.29) | 0.05 (-0.06-0.17)  | 0.06 (-0.06-0.17)   | 0.05 (-0.07-0.16)  | 0.06 (-0.06-0.17)  |
| 6.1-6.9                                 | 7.79 (1.26) | 0.06 (-0.06-0.18)  | 0.06 (-0.06-0.19)   | 0.05 (-0.07-0.18)  | 0.06 (-0.06-0.19)  |
| 7.0-8.4                                 | 8.01 (1.35) | 0.23 (0.09-0.36)   | 0.23 (0.10-0.37)    | 0.22 (0.09-0.36)   | 0.23 (0.10-0.36)   |
| ≥ 8.5                                   | 8.17 (1.40) | 0.33 (0.13-0.53)   | 0.34 (0.14-0.54)    | 0.32 (0.12-0.52)   | 0.33 (0.13-0.53)   |

SUPPLEMENTARY DATA

|                 | <b>Child 1-h Glucose (mmol/l)</b> |                    |                    |                    |                    |
|-----------------|-----------------------------------|--------------------|--------------------|--------------------|--------------------|
| FPG (mmol/l)    |                                   |                    |                    |                    |                    |
| ≤ 4.2           | 6.72 (1.61)                       | -                  | -                  | -                  | -                  |
| 4.2-4.4         | 6.79 (1.69)                       | -0.03 (-0.18-0.13) | -0.02 (-0.17-0.13) | -0.03 (-0.18-0.12) | -0.02 (-0.17-0.13) |
| 4.5-4.7         | 6.86 (1.72)                       | -0.02 (-0.18-0.14) | -0.67 (-0.17-0.15) | -0.02 (-0.18-0.14) | -0.01 (-0.17-0.15) |
| 4.8-5.0         | 6.88 (1.67)                       | -0.06 (-0.24-0.12) | -0.04 (-0.23-0.14) | -0.07 (-0.25-0.12) | -0.04 (-0.23-0.15) |
| ≥ 5.1           | 7.09 (1.69)                       | 0.09 (-0.15-0.32)  | 0.12 (-0.12-0.36)  | 0.08 (-0.16-0.31)  | 0.12 (-0.12-0.36)  |
| 1-h PG (mmol/l) |                                   |                    |                    |                    |                    |
| ≤ 5.8           | 6.48 (1.57)                       | -                  | -                  | -                  | -                  |
| 5.9-7.3         | 6.73 (1.61)                       | 0.21 (0.07-0.36)   | 0.22 (0.08-0.37)   | 0.21 (0.07-0.36)   | 0.22 (0.08-0.37)   |
| 7.4-8.6         | 6.95 (1.65)                       | 0.37 (0.21-0.52)   | 0.38 (0.23-0.54)   | 0.37 (0.21-0.52)   | 0.38 (0.23-0.54)   |
| 8.7-9.9         | 6.97 (1.76)                       | 0.38 (0.20-0.56)   | 0.40 (0.22-0.58)   | 0.37 (0.19-0.55)   | 0.40 (0.22-0.58)   |
| ≥ 10.0          | 7.51 (1.92)                       | 0.80 (0.58-1.03)   | 0.82 (0.60-1.05)   | 0.80 (0.57-1.02)   | 0.82 (0.59-1.05)   |
| 2-h PG (mmol/l) |                                   |                    |                    |                    |                    |
| ≤ 5.0           | 6.56 (1.67)                       | -                  | -                  | -                  | -                  |
| 5.1-6.0         | 6.75 (1.67)                       | 0.11 (-0.04-0.26)  | 0.12 (-0.03-0.27)  | 0.11 (-0.04-0.25)  | 0.12 (-0.03-0.27)  |
| 6.1-6.9         | 6.88 (1.64)                       | 0.18 (0.02-0.34)   | 0.19 (0.03-0.35)   | 0.17 (0.02-0.33)   | 0.19 (0.03-0.35)   |
| 7.0-8.4         | 7.03 (1.67)                       | 0.28 (0.11-0.45)   | 0.29 (0.12-0.46)   | 0.27 (0.10-0.45)   | 0.29 (0.11-0.46)   |
| ≥ 8.5           | 7.32 (1.87)                       | 0.50 (0.25-0.76)   | 0.52 (0.26-0.78)   | 0.49 (0.24-0.75)   | 0.51 (0.25-0.77)   |
|                 | <b>Child 2-h Glucose (mmol/l)</b> |                    |                    |                    |                    |
| FPG (mmol/l)    |                                   |                    |                    |                    |                    |

SUPPLEMENTARY DATA

|                 |                                      |                   |                    |                    |                   |
|-----------------|--------------------------------------|-------------------|--------------------|--------------------|-------------------|
| ≤ 4.2           | 5.83 (1.07)                          | -                 | -                  | -                  | -                 |
| 4.2-4.4         | 5.97 (1.24)                          | 0.06 (-0.04-1.16) | 0.06 (-0.04-0.16)  | 0.05 (-0.06-0.15)  | 0.06 (-0.05-0.16) |
| 4.5-4.7         | 5.96 (1.10)                          | 0.02 (-0.09-0.13) | 0.02 (-0.09-0.13)  | 0.01 (-0.10-0.11)  | 0.02 (-0.08-0.13) |
| 4.8-5.0         | 6.06 (1.08)                          | 0.07 (-0.06-0.19) | 0.07 (-0.05-0.20)  | 0.05 (-0.08-0.17)  | 0.07 (-0.05-0.20) |
| ≥ 5.1           | 6.18 (1.19)                          | 0.15 (-0.01-0.31) | 0.16 (-0.003-0.32) | 0.11 (-0.05-0.27)  | 0.15 (-0.01-0.31) |
| 1-h PG (mmol/l) |                                      |                   |                    |                    |                   |
| ≤ 5.8           | 5.81 (1.20)                          | -                 | -                  | -                  | -                 |
| 5.9-7.3         | 5.93 (1.09)                          | 0.10 (0.002-0.20) | 0.10 (0.003-0.20)  | 0.09 (-0.003-0.19) | 0.10 (0.01-0.20)  |
| 7.4-8.6         | 6.02 (1.10)                          | 0.18 (0.08-0.29)  | 0.19 (0.08-0.29)   | 0.17 (0.07-0.28)   | 0.19 (0.08-0.29)  |
| 8.7-9.9         | 6.00 (1.16)                          | 0.16 (0.04-0.28)  | 0.16 (0.04-0.29)   | 0.14 (0.01-0.26)   | 0.15 (0.03-0.28)  |
| ≥ 10.0          | 6.36 (1.34)                          | 0.44 (0.29-0.60)  | 0.45 (0.29-0.60)   | 0.42 (0.27-0.58)   | 0.44 (0.29-0.59)  |
| 2-h PG (mmol/l) |                                      |                   |                    |                    |                   |
| ≤ 5.0           | 5.86 (1.23)                          | -                 | -                  | -                  | -                 |
| 5.1-6.0         | 5.93 (1.10)                          | 0.06 (-0.05-0.16) | 0.06 (-0.04-0.16)  | 0.04 (-0.06-0.14)  | 0.05 (-0.05-0.15) |
| 6.1-6.9         | 5.98 (1.09)                          | 0.08 (-0.03-0.19) | 0.08 (-0.03-0.19)  | 0.06 (-0.04-0.17)  | 0.08 (-0.03-0.18) |
| 7.0-8.4         | 6.05 (1.15)                          | 0.11 (-0.01-0.23) | 0.11 (-0.004-0.23) | 0.09 (-0.02-0.21)  | 0.11 (-0.01-0.22) |
| ≥ 8.5           | 6.28 (1.35)                          | 0.30 (0.13-0.47)  | 0.30 (0.13-0.47)   | 0.26 (0.09-0.43)   | 0.27 (0.10-0.45)  |
|                 | <b>Child Sum of Glucose Z-scores</b> |                   |                    |                    |                   |
| FPG (mmol/l)    |                                      |                   |                    |                    |                   |
| ≤ 4.2           | -0.52 (2.73)                         | -                 | -                  | -                  | -                 |
| 4.2-4.4         | -0.13 (2.91)                         | 0.19 (-0.05-0.43) | 0.20 (-0.04-0.44)  | 0.17 (-0.07-0.41)  | 0.19 (-0.05-0.43) |

SUPPLEMENTARY DATA

|                 |                      |                      |                      |                      |                      |
|-----------------|----------------------|----------------------|----------------------|----------------------|----------------------|
| 4.5-4.7         | 0.06 (2.8)           | 0.29 (0.04-0.54)     | 0.31 (0.06-0.57)     | 0.27 (0.01-0.52)     | 0.31 (0.06-0.57)     |
| 4.8-5.0         | 0.45 (2.74)          | 0.50 (0.21-0.79)     | 0.53 (0.23-0.82)     | 0.46 (0.17-0.745)    | 0.53 (0.24-0.83)     |
| ≥ 5.1           | 0.54 (2.79)          | 0.55 (0.18-0.93)     | 0.61 (0.23-0.99)     | 0.48 (0.11-0.85)     | 0.60 (0.22-0.98)     |
| 1-h PG (mmol/l) |                      |                      |                      |                      |                      |
| ≤ 5.8           | -0.67 (2.87)         | -                    | -                    | -                    | -                    |
| 5.9-7.3         | -0.29 (2.68)         | 0.29 (0.06-0.52)     | 0.30 (0.07-0.54)     | 0.28 (0.06-0.51)     | 0.31 (0.08-0.54)     |
| 7.4-8.6         | 0.23 (2.73)          | 0.64 (0.39-0.88)     | 0.65 (0.41-0.90)     | 0.62 (0.38-0.86)     | 0.65 (0.41-0.90)     |
| 8.7-9.9         | 0.38 (2.8)           | 0.74 (0.45-1.02)     | 0.76 (0.47-1.05)     | 0.69 (0.41-0.98)     | 0.74 (0.46-1.03)     |
| ≥ 10.0          | 1.31 (3.14)          | 1.50 (1.14-1.86)     | 1.52 (1.16-1.88)     | 1.47 (1.11-1.82)     | 1.51 (1.15-1.87)     |
| 2-h PG (mmol/l) |                      |                      |                      |                      |                      |
| ≤ 5.0           | -0.55 (2.91)         | -                    | -                    | -                    | -                    |
| 5.1-6.0         | -0.18 (2.73)         | 0.24 (0.01-0.48)     | 0.25 (0.02-0.49)     | 0.21 (-0.02-0.45)    | 0.24 (0.004-0.47)    |
| 6.1-6.9         | 0.05 (2.67)          | 0.32 (0.07-0.57)     | 0.33 (0.08-0.58)     | 0.29 (0.04-0.54)     | 0.32 (0.07-0.57)     |
| 7.0-8.4         | 0.45 (2.94)          | 0.57 (0.29-0.84)     | 0.58 (0.30-0.85)     | 0.54 (0.27-0.81)     | 0.56 (0.29-0.84)     |
| ≥ 8.5           | 0.99 (3.01)          | 0.91 (0.51-1.32)     | 0.93 (0.52-1.34)     | 0.85 (0.44-1.25)     | 0.88 (0.48-1.29)     |
|                 | <b>Child A1c (%)</b> |                      |                      |                      |                      |
| FPG (mmol/l)    |                      |                      |                      |                      |                      |
| ≤ 4.2           | 5.20 (0.29)          | -                    | -                    | -                    | -                    |
| 4.2-4.4         | 5.21 (0.29)          | 0.007 (-0.019-0.033) | 0.006 (-0.020-0.032) | 0.005 (-0.021-0.031) | 0.006 (-0.021-0.032) |
| 4.5-4.7         | 5.22 (0.28)          | 0.015 (-0.012-0.043) | 0.013 (-0.015-0.041) | 0.013 (-0.015-0.040) | 0.014 (-0.014-0.041) |
| 4.8-5.0         | 5.21 (0.29)          | 0.016 (-0.015-0.047) | 0.013 (-0.019-0.044) | 0.011 (-0.020-0.042) | 0.013 (-0.018-0.045) |

SUPPLEMENTARY DATA

|                 |             |                       |                       |                       |                       |
|-----------------|-------------|-----------------------|-----------------------|-----------------------|-----------------------|
| ≥ 5.1           | 5.24 (0.28) | 0.052 (0.013-0.092)   | 0.047 (0.007-0.088)   | 0.043 (0.004-0.083)   | 0.046 (0.006-0.086)   |
| 1-h PG (mmol/l) |             |                       |                       |                       |                       |
| ≤ 5.8           | 5.19 (0.28) | -                     | -                     | -                     | -                     |
| 5.9-7.3         | 5.21 (0.29) | 0.010 (-0.015-0.035)  | 0.009 (-0.016-0.034)  | 0.009 (-0.016-0.034)  | 0.009 (-0.016-0.034)  |
| 7.4-8.6         | 5.21 (0.30) | 0.026 (0.000-0.053)   | 0.025 (-0.002-0.051)  | 0.024 (-0.002-0.050)  | 0.025 (-0.002-0.051)  |
| 8.7-9.9         | 5.25 (0.28) | 0.056 (0.025-0.087)   | 0.054 (0.023-0.085)   | 0.051 (0.020-0.082)   | 0.052 (0.021-0.083)   |
| ≥ 10.0          | 5.24 (0.29) | 0.046 (0.008-0.085)   | 0.045 (0.006-0.083)   | 0.042 (0.004-0.081)   | 0.043 (0.005-0.082)   |
| 2-h PG (mmol/l) |             |                       |                       |                       |                       |
| ≤ 5.0           | 5.19 (0.27) | -                     | -                     | -                     | -                     |
| 5.1-6.0         | 5.19 (0.29) | -0.006 (-0.032-0.019) | -0.008 (-0.034-0.017) | -0.011 (-0.036-0.015) | -0.010 (-0.036-0.015) |
| 6.1-6.9         | 5.22 (0.29) | 0.010 (-0.017-0.037)  | 0.008 (-0.019-0.035)  | 0.007 (-0.020-0.034)  | 0.007 (-0.020-0.034)  |
| 7.0-8.4         | 5.25 (0.29) | 0.026 (-0.003-0.06)   | 0.024 (-0.006-0.054)  | 0.022 (-0.007-0.051)  | 0.022 (-0.007-0.052)  |
| ≥ 8.5           | 5.24 (0.30) | 0.027 (-0.016-0.071)  | 0.024 (-0.019-0.068)  | 0.019 (-0.024-0.063)  | 0.020 (-0.024-0.063)  |

The lowest three categories for FPG, 1-h PG and 2-h PG were used for analyses of glucose levels during the original HAPO Study; the fourth category includes values up to the fifth category for each measure that correspond to IADPSG diagnostic thresholds for GDM.

Adjusted mean differences for the continuous outcomes are for each category relative to the lowest category. Model 1: Adjusted for field center + child age, sex, pubertal status (Tanner stage 1, 2/3, 4/5, sex x Tanner stage interaction) + maternal variables at pregnancy OGTT (age, height, mean arterial pressure, parity (0, 1+), smoking (yes/no), drinking (yes/no), gestational age), child's family history of diabetes in first degree relatives. Model 2: Model 1 + maternal BMI at pregnancy OGTT. Model 3: Model 1 + child's BMI z-score. Model 4: Model 1 + maternal BMI at pregnancy OGTT + child's BMI z-score.

SUPPLEMENTARY DATA

**Supplementary Table 6. Means of child calculated indices and adjusted mean differences for Models 1-4 across maternal glucose categories**

| Maternal Glucose Levels    | Mean (SD)      | Model 1 Adjusted Mean Difference (95% CI) | Model 2 Adjusted Mean Difference (95% CI) | Model 3 Adjusted Mean Difference (95% CI) | Model 4 Adjusted Mean Difference (95% CI) |
|----------------------------|----------------|-------------------------------------------|-------------------------------------------|-------------------------------------------|-------------------------------------------|
| <b>Child Matsuda Index</b> |                |                                           |                                           |                                           |                                           |
| FPG (mmol/l)               |                |                                           |                                           |                                           |                                           |
| ≤ 4.2                      | 1932.5 (790.9) | -                                         | -                                         | -                                         | -                                         |
| 4.2-4.4                    | 1858.9 (740.7) | -50.2 (-111.8-11.5)                       | -37.1 (-98.2-24.5)                        | -25.6 (-80.7-28.9)                        | -30.5 (-85.6-24.5)                        |
| 4.5-4.7                    | 1784.2 (771.8) | -77.5 (-142.4- -12.5)                     | -53.5 (-118.4-11.5)                       | -49.1 (-106.9-8.2)                        | -57.8 (-116.2-0.5)                        |
| 4.8-5.0                    | 1694.7 (656.2) | -158.2 (-231.8- -84.0)                    | -119.5 (-194.2- -44.7)                    | -111.3 (-177.3- -45.3)                    | -124.9 (-192.0- -58.4)                    |
| ≥ 5.1                      | 1615.6 (747.3) | -184.9 (-279.8- -90.0)                    | -124.9 (-221.5- -28.4)                    | -92.2 (-176.7- -7.6)                      | -113.5 (-200.2- -27.3)                    |
| 1-h PG (mmol/l)            |                |                                           |                                           |                                           |                                           |
| ≤ 5.8                      | 1942.4 (766.4) | -                                         | -                                         | -                                         | -                                         |
| 5.9-7.3                    | 1874.2 (787.1) | -51.8 (-110.2-7.1)                        | -39.3 (-98.2-19.6)                        | -39.3 (-91.6-13.6)                        | -43.1 (-95.5-9.8)                         |
| 7.4-8.6                    | 1764.5 (710.2) | -114.5 (-177.3- -51.8)                    | -97.1 (-159.3- -34.4)                     | -92.2 (-147.8- -36.0)                     | -97.6 (-153.3- -41.5)                     |
| 8.7-9.9                    | 1677.3 (677.5) | -169.6 (-242.7- -96.5)                    | -142.9 (-216.0- -69.8)                    | -116.7 (-181.6- -51.8)                    | -124.4 (-189.3- -58.9)                    |
| ≥ 10.0                     | 1595.5 (684.5) | -215.5 (-307.1- -123.8)                   | -190.9 (-282.5- -99.3)                    | -173.5 (-255.3- -92.2)                    | -181.6 (-262.4- -99.3)                    |
| 2-h PG (mmol/l)            |                |                                           |                                           |                                           |                                           |
| ≤ 5.0                      | 1959.8 (828.5) | -                                         | -                                         | -                                         | -                                         |
| 5.1-6.0                    | 1810.4 (733.1) | -100.9 (-160.9- -40.4)                    | -80.7 (-140.7- -20.7)                     | -58.9 (-112.4- -5.5)                      | -63.8 (-117.3- -9.8)                      |
| 6.1-6.9                    | 1804.9 (726.0) | -82.9 (-146.7- -18.5)                     | -61.6 (-126.0- -2.2)                      | -50.7 (-108.0-6.0)                        | -56.2 (-112.9- 1.1)                       |

SUPPLEMENTARY DATA

|                                  |                |                        |                        |                        |                        |
|----------------------------------|----------------|------------------------|------------------------|------------------------|------------------------|
| 7.0-8.4                          | 1719.3 (706.4) | -141.3 (-211.6- -71.5) | -123.3 (-193.1- -53.5) | -103.6 (-166.4- -41.5) | -108.0 (-170.7- -45.8) |
| ≥ 8.5                            | 1608.0 (691.1) | -196.4 (-299.5- -92.7) | -168.5 (-271.6- -64.9) | -114.5 (-206.7- -22.4) | -120.5 (-212.7- -28.4) |
| <b>Child Insulinogenic Index</b> |                |                        |                        |                        |                        |
| FPG (mmol/l)                     |                |                        |                        |                        |                        |
| ≤ 4.2                            | 0.78 (0.75)    | -                      | -                      | -                      | -                      |
| 4.2-4.4                          | 0.81 (0.70)    | 0.05 (-0.01-0.11)      | 0.04 (-0.03-0.10)      | 0.04 (-0.02-0.10)      | 0.04 (-0.03-0.10)      |
| 4.5-4.7                          | 0.83 (0.65)    | 0.06 (-0.01-0.13)      | 0.04 (-0.03-0.11)      | 0.05 (-0.02-0.11)      | 0.04 (-0.03-0.11)      |
| 4.8-5.0                          | 0.83 (0.65)    | 0.08 (0.00-0.16)       | 0.05 (-0.03-0.12)      | 0.06 (-0.02-0.14)      | 0.05 (-0.03-0.13)      |
| ≥ 5.1                            | 0.87 (0.69)    | 0.11 (0.01-0.21)       | 0.06 (-0.05-0.16)      | 0.07 (-0.03-0.17)      | 0.05 (-0.05-0.15)      |
| 1-h PG (mmol/l)                  |                |                        |                        |                        |                        |
| ≤ 5.8                            | 0.88 (0.76)    | -                      | -                      | -                      | -                      |
| 5.9-7.3                          | 0.83 (0.77)    | -0.03 (-0.10-0.03)     | -0.04 (-0.11-0.02)     | -0.04 (-0.10-0.02)     | -0.04 (-0.10-0.02)     |
| 7.4-8.6                          | 0.78 (0.62)    | -0.07 (-0.14- -0.01)   | -0.09 (-0.16- -0.02)   | -0.08 (-0.15- -0.02)   | -0.09 (-0.16- -0.02)   |
| 8.7-9.9                          | 0.81 (0.63)    | -0.05 (-0.13-0.02)     | -0.08 (-0.16-0.001)    | -0.07 (-0.15-0.004)    | -0.08 (-0.16- -0.01)   |
| ≥ 10.0                           | 0.72 (0.46)    | -0.14 (-0.23- -0.04)   | -0.16 (-0.26- -0.06)   | -0.16 (-0.25- -0.06)   | -0.17 (-0.26- -0.07)   |
| 2-h PG (mmol/l)                  |                |                        |                        |                        |                        |
| ≤ 5.0                            | 0.84 (0.71)    | -                      | -                      | -                      | -                      |
| 5.1-6.0                          | 0.84 (0.72)    | 0.02 (-0.05-0.08)      | 0.001 (-0.06-0.06)     | -0.001 (-0.06-0.06)    | -0.01 (-0.06-0.06)     |
| 6.1-6.9                          | 0.81 (0.77)    | -0.0001 (-0.07-0.07)   | -0.02 (-0.09-0.05)     | -0.014 (-0.08-0.05)    | -0.02 (-0.09-0.05)     |
| 7.0-8.4                          | 0.78 (0.56)    | -0.03 (-0.10-0.05)     | -0.04 (-0.12-0.03)     | -0.04 (-0.12-0.03)     | -0.05 (-0.12-0.02)     |
| ≥ 8.5                            | 0.77 (0.55)    | -0.04 (-0.15,0.07)     | -0.06 (-0.17-0.04)     | -0.08 (-0.18-0.03)     | -0.08 (-0.19-0.02)     |

SUPPLEMENTARY DATA

|                 | Child Disposition Index* |                        |                       |                         |                       |
|-----------------|--------------------------|------------------------|-----------------------|-------------------------|-----------------------|
| FPG (mmol/l)    |                          |                        |                       |                         |                       |
| ≤ 4.2           | 7.07 (6.32)              | -                      | -                     | -                       | -                     |
| 4.2-4.4         | 7.04 (6.39)              | 0.017 (-0.036-0.070)   | 0.014 (-0.039-0.067)  | 0.019 (-0.034-0.072)    | 0.015 (-0.038-0.061)  |
| 4.5-4.7         | 7.02 (6.33)              | 0.012 (-0.044-0.068)   | 0.0075 (-0.049-0.064) | 0.015 (-0.041-0.070)    | 0.0072 (-0.049-0.063) |
| 4.8-5.0         | 6.97 (6.34)              | -0.0050 (-0.069-0.059) | -0.012 (-0.077-0.053) | -0.00080 (-0.065-0.063) | -0.013 (-0.078-0.052) |
| ≥ 5.1           | 6.97 (6.39)              | -0.0011 (-0.083-0.081) | -0.012 (-0.096-0.072) | 0.0072 (-0.075-0.089)   | -0.01 (-0.095-0.073)  |
| 1-h PG (mmol/l) |                          |                        |                       |                         |                       |
| ≤ 5.8           | 7.15 (6.41)              | -                      | -                     | -                       | -                     |
| 5.9-7.3         | 7.07 (6.34)              | -0.060 (-0.11--0.0093) | -0.064 (-0.11--0.013) | -0.059 (-0.11--0.0084)  | -0.064 (-0.11--0.013) |
| 7.4-8.6         | 6.97 (6.31)              | -0.13 (-0.18--0.075)   | -0.13 (-0.19--0.079)  | -0.13 (-0.18--0.073)    | -0.13 (-0.19--0.080)  |
| 8.7-9.9         | 6.95 (6.34)              | -0.14 (-0.21--0.079)   | -0.15 (-0.22--0.085)  | -0.14 (-0.20--0.074)    | -0.15 (-0.21--0.084)  |
| ≥ 10.0          | 6.80 (6.38)              | -0.27 (-0.35--0.19)    | -0.27 (-0.35--0.19)   | -0.26 (-0.34--0.18)     | -0.27 (-0.35--0.19)   |
| 2-h PG (mmol/l) |                          |                        |                       |                         |                       |
| ≤ 5.0           | 7.11 (6.36)              | -                      | -                     | -                       | -                     |
| 5.1-6.0         | 7.04 (6.37)              | -0.025 (-0.077-0.027)  | -0.029 (-0.081-0.024) | -0.022 (-0.074-0.031)   | -0.027 (-0.080-0.025) |
| 6.1-6.9         | 7.02 (6.33)              | -0.039 (-0.094-0.016)  | -0.043 (-0.099-0.012) | -0.037 (-0.092-0.019)   | -0.043 (-0.098-0.013) |
| 7.0-8.4         | 6.95 (6.36)              | -0.10 (-0.16--0.042)   | -0.11 (-0.17--0.045)  | -0.099 (-0.16--0.038)   | -0.11 (-0.16--0.043)  |
| ≥ 8.5           | 6.85 (6.36)              | -0.17 (-0.26--0.078)   | -0.17 (-0.26--0.083)  | -0.16 (-0.25--0.070)    | -0.167 (-0.26--0.077) |



## SUPPLEMENTARY DATA

\*Child disposition index is reported on a log scale.

The lowest three categories for FPG, 1-h PG and 2-h PG were used for analyses of glucose levels during the original HAPO Study; the fourth category includes values up to the fifth category for each measure that correspond to IADPSG diagnostic thresholds for GDM.

Adjusted mean differences for the continuous outcomes are for each category relative to the lowest category. Model 1: Adjusted for field center + child age, sex, pubertal status (Tanner stage 1, 2/3, 4/5, sex x Tanner stage interaction) + maternal variables at pregnancy OGTT (age, height, mean arterial pressure, parity (0, 1+), smoking (yes/no), drinking (yes/no), gestational age), child's family history of diabetes in first degree relatives. Model 2: Model 1 + maternal BMI at pregnancy OGTT. Model 3: Model 1 + child's BMI z-score. Model 4: Model 1 + maternal BMI at pregnancy OGTT + child's BMI z-score.

SUPPLEMENTARY DATA

**Supplementary Table 7. Frequencies of child dichotomous outcomes and odds ratios (95% CI) for Models 1-4 across maternal glucose categories**

| <b>Maternal Glucose Levels</b> | <b>n/Total N (%)</b> | <b>Model 1<br/>OR<br/>(95% CI)</b> | <b>Model 2<br/>OR<br/>(95% CI)</b> | <b>Model 3<br/>OR<br/>(95% CI)</b> | <b>Model 4<br/>OR<br/>(95% CI)</b> |
|--------------------------------|----------------------|------------------------------------|------------------------------------|------------------------------------|------------------------------------|
| <b>Child IFG</b>               |                      |                                    |                                    |                                    |                                    |
| FPG (mmol/l)                   |                      |                                    |                                    |                                    |                                    |
| ≤ 4.2                          | 34/701 (4.85%)       | -                                  | -                                  | -                                  | -                                  |
| 4.2-4.4                        | 106/1344 (7.89%)     | 1.73 (1.14-2.62)                   | 1.73 (1.14-2.62)                   | 1.73 (1.14-2.62)                   | 1.74 (1.15-2.64)                   |
| 4.5-4.7                        | 82/1136 (7.22%)      | 1.55 (1.00-2.39)                   | 1.55 (1.00-2.40)                   | 1.54 (1.00-2.38)                   | 1.56 (1.01-2.42)                   |
| 4.8-5.0                        | 63/675 (9.33%)       | 2.17 (1.35-3.46)                   | 2.18 (1.36-3.51)                   | 2.16 (1.35-3.45)                   | 2.20 (1.37-3.54)                   |
| ≥ 5.1                          | 31/294 (10.54%)      | 2.19 (1.25-3.81)                   | 2.22 (1.26-3.90)                   | 2.15 (1.23-3.74)                   | 2.22 (1.26-3.90)                   |
| 1-h PG (mmol/l)                |                      |                                    |                                    |                                    |                                    |
| ≤ 5.8                          | 51/780 (6.54%)       | -                                  | -                                  | -                                  | -                                  |
| 5.9-7.3                        | 82/1352 (6.07%)      | 0.86 (0.59-1.25)                   | 0.86 (0.59-1.25)                   | 0.86 (0.59-1.25)                   | 0.86 (0.59-1.26)                   |
| 7.4-8.6                        | 96/1094 (8.78%)      | 1.21 (0.83-1.76)                   | 1.20 (0.82-1.76)                   | 1.20 (0.82-1.75)                   | 1.20 (0.83-1.76)                   |
| 8.7-9.9                        | 57/622 (9.16%)       | 1.16 (0.76-1.77)                   | 1.15 (0.75-1.77)                   | 1.14 (0.74-1.74)                   | 1.15 (0.75-1.76)                   |
| ≥ 10.0                         | 30/302 (9.93%)       | 1.31 (0.79-2.19)                   | 1.31 (0.78-2.19)                   | 1.29 (0.77-2.15)                   | 1.30 (0.78-2.17)                   |
| 2-h PG (mmol/l)                |                      |                                    |                                    |                                    |                                    |
| ≤ 5.0                          | 36/756 (4.76%)       | -                                  | -                                  | -                                  | -                                  |
| 5.1-6.0                        | 104/1333 (7.80%)     | 1.64 (1.09-2.46)                   | 1.64 (1.09-2.46)                   | 1.61 (1.07-2.41)                   | 1.62 (1.07-2.43)                   |
| 6.1-6.9                        | 88/1075 (8.19%)      | 1.60 (1.05-2.43)                   | 1.59 (1.04-2.44)                   | 1.57 (1.03-2.40)                   | 1.58 (1.03-2.42)                   |
| 7.0-8.4                        | 70/765 (9.15%)       | 1.60 (1.02-2.50)                   | 1.60 (1.02-2.50)                   | 1.56 (1.00-2.45)                   | 1.57 (1.00-2.46)                   |

SUPPLEMENTARY DATA

|                  |                 |                  |                  |                  |                  |
|------------------|-----------------|------------------|------------------|------------------|------------------|
| ≥ 8.5            | 18/221 (8.14%)  | 1.42 (0.76-2.66) | 1.42 (0.76-2.66) | 1.38 (0.74-2.59) | 1.39 (0.74-2.61) |
| <b>Child IGT</b> |                 |                  |                  |                  |                  |
| FPG (mmol/l)     |                 |                  |                  |                  |                  |
| ≤ 4.2            | 29/692 (4.19%)  | -                | -                | -                | -                |
| 4.2-4.4          | 82/1325 (6.19%) | 1.35 (0.87-2.10) | 1.37 (0.88-2.13) | 1.32 (0.85-2.06) | 1.36 (0.87-2.11) |
| 4.5-4.7          | 57/1124 (5.07%) | 1.05 (0.65-1.68) | 1.08 (0.67-1.73) | 1.03 (0.64-1.65) | 1.08 (0.67-1.74) |
| 4.8-5.0          | 40/664 (6.02%)  | 1.18 (0.71-1.97) | 1.23 (0.74-2.07) | 1.14 (0.68-1.90) | 1.24 (0.74-2.08) |
| ≥ 5.1            | 30/289 (10.38%) | 1.93 (1.10-3.40) | 2.07 (1.16-3.70) | 1.82 (1.03-3.21) | 2.07 (1.16-3.70) |
| 1-h PG (mmol/l)  |                 |                  |                  |                  |                  |
| ≤ 5.8            | 29/773 (3.75%)  | -                | -                | -                | -                |
| 5.9-7.3          | 65/1329 (4.89%) | 1.31 (0.83-2.06) | 1.32 (0.84-2.08) | 1.30 (0.83-2.05) | 1.34 (0.84-2.11) |
| 7.4-8.6          | 63/1080 (5.83%) | 1.58 (0.99-2.51) | 1.62 (1.01-2.58) | 1.55 (0.97-2.47) | 1.61 (1.01-2.57) |
| 8.7-9.9          | 39/615 (6.34%)  | 1.69 (1.01-2.83) | 1.75 (1.04-2.94) | 1.65 (0.98-2.76) | 1.75 (1.04-2.94) |
| ≥ 10.0           | 42/297 (14.14%) | 3.62 (2.14-6.13) | 3.74 (2.20-6.35) | 3.56 (2.10-6.02) | 3.77 (2.22-6.40) |
| 2-h PG (mmol/l)  |                 |                  |                  |                  |                  |
| ≤ 5.0            | 35/749 (4.67%)  | -                | -                | -                | -                |
| 5.1-6.0          | 76/1312 (5.79%) | 1.26 (0.83-1.92) | 1.28 (0.84-1.96) | 1.22 (0.80-1.86) | 1.26 (0.83-1.93) |
| 6.1-6.9          | 54/1058 (5.10%) | 1.06 (0.68-1.67) | 1.08 (0.69-1.71) | 1.04 (0.66-1.64) | 1.08 (0.69-1.71) |
| 7.0-8.4          | 48/760 (6.32%)  | 1.25 (0.78-1.99) | 1.27 (0.79-2.03) | 1.22 (0.76-1.96) | 1.27 (0.79-2.04) |
| ≥ 8.5            | 25/215 (11.63%) | 2.12 (1.20-3.76) | 2.17 (1.22-3.86) | 2.01 (1.14-3.57) | 2.11 (1.18-3.74) |

## SUPPLEMENTARY DATA

The lowest three categories for FPG, 1-h PG and 2-h PG were used for analyses of glucose levels during the original HAPO Study; the fourth category includes values up to the fifth category for each measure that correspond to IADPSG diagnostic thresholds for GDM.

Adjusted mean differences for the continuous outcomes are for each category relative to the lowest category. Model 1: Adjusted for field center + child age, sex, pubertal status (Tanner stage 1, 2/3, 4/5, sex x Tanner stage interaction) + maternal variables at pregnancy OGTT (age, height, mean arterial pressure, parity (0, 1+), smoking (yes/no), drinking (yes/no), gestational age), child's family history of diabetes in first degree relatives. Model 2: Model 1 + maternal BMI at pregnancy OGTT. Model 3: Model 1 + child's BMI z-score. Model 4: Model 1 + maternal BMI at pregnancy OGTT + child's BMI z-score.

SUPPLEMENTARY DATA

**Supplementary Figure 1. Flowchart describing enrollment for children participating in the HAPO Follow-up Study (FUS).**

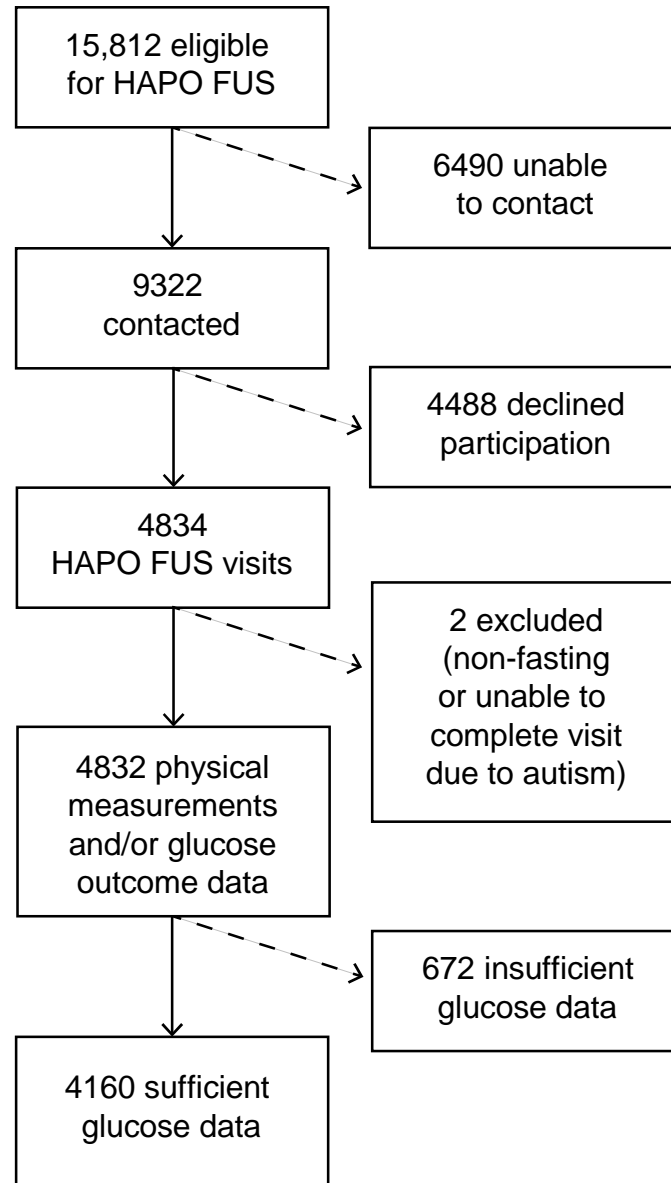

## SUPPLEMENTARY DATA

### **APPENDIX HAPO - Follow-up Study Cooperative Research Group**

Chaicharn Deerochanawong, Thadchanan Tanaphonpoonsuk, Sukeeta Binratkaew Uraiwan Chotigeat, Wanee Manyam, Martinette Forde, Andre Greenidge, Kathleen Neblett, Paula Michele Lashley, Desiree Walcott, Katie Corry, Loraine Francis, Jo-anne Irwin, Anne Langan, David R McCance, Maureen Mousavi, Ian Young, Jennifer Gutierrez, Jennifer Jimenez, Jean M Lawrence, David A Sacks, Harpreet S Takhar, Elizabeth Tanton, Wendy J Brickman, Jennifer Howard, Jami L Josefson, Lauren Miller, Jacqui Bjaloncik, Patrick M Catalano, Ajuah Davis, Michaela Koontz, Lorraine Presley, Shoi Smith, Amanda Tyhulski, Albert Martin Li, Ronald C Ma, Risa Ozaki, Wing Hung Tam, Michelle Wong, Cindy Siu Man Yuen, Peter E Clayton, Aysha Khan, Avni Vyas, Michael Maresh, Hadasse Benzaquen, Naama Glickman, Alona Hamou, Orna Hermon, Orit Horesh, Yael Keren, Yael Lebenthal, Shlomit Shalitin, Kristina Cordeiro, Jill Hamilton, Hahn Y Nguyen, Shawna Steele, Fei Chen, Alan R Dyer, Wenyu Huang, Alan Kuang, Maria Jimenez, Lynn P Lowe, William L Lowe, Jr, Boyd E Metzger, Michael Nodzenski, Anna Reisetter, Denise Scholtens, Octavious Talbot, Paul Yim, David Dunger, Alicia Thomas, Mary Horlick, Barbara Linder, Aynur Unalp-Arida, Gilman Grave
